# Supplementary material
Source: publisher site journal article supplement (https://www.dovepress.com/article/458901)
Supplement: Supplementary file 1 [file get_supplementary_file.php]

## Table of Contents

|                                                                                                                                          |   |
|------------------------------------------------------------------------------------------------------------------------------------------|---|
| <b>Supplemental Figure 1.</b> Standardized mean differences of covariates before and after weighting for cohort 2.....                   | 1 |
| <b>Supplemental Figure 2.</b> Weighted and unweighted cumulative incidence curves of PASC defining PASC as $ML \geq 0.7$ or U09.9 .....  | 2 |
| <b>Supplemental Table 1.</b> Weighted and unweighted distribution of baseline covariates for cohort 2 .....                              | 3 |
| <b>Supplemental Table 2.</b> Weighted risk estimates defining PASC above and below predicted probability $\geq 0.7$ .....                | 4 |
| <b>Supplemental Table 3.</b> Weighted and unweighted risk estimates defining PASC as $ML \geq 0.7$ or U09.9 probability $\geq 0.7$ ..... | 5 |

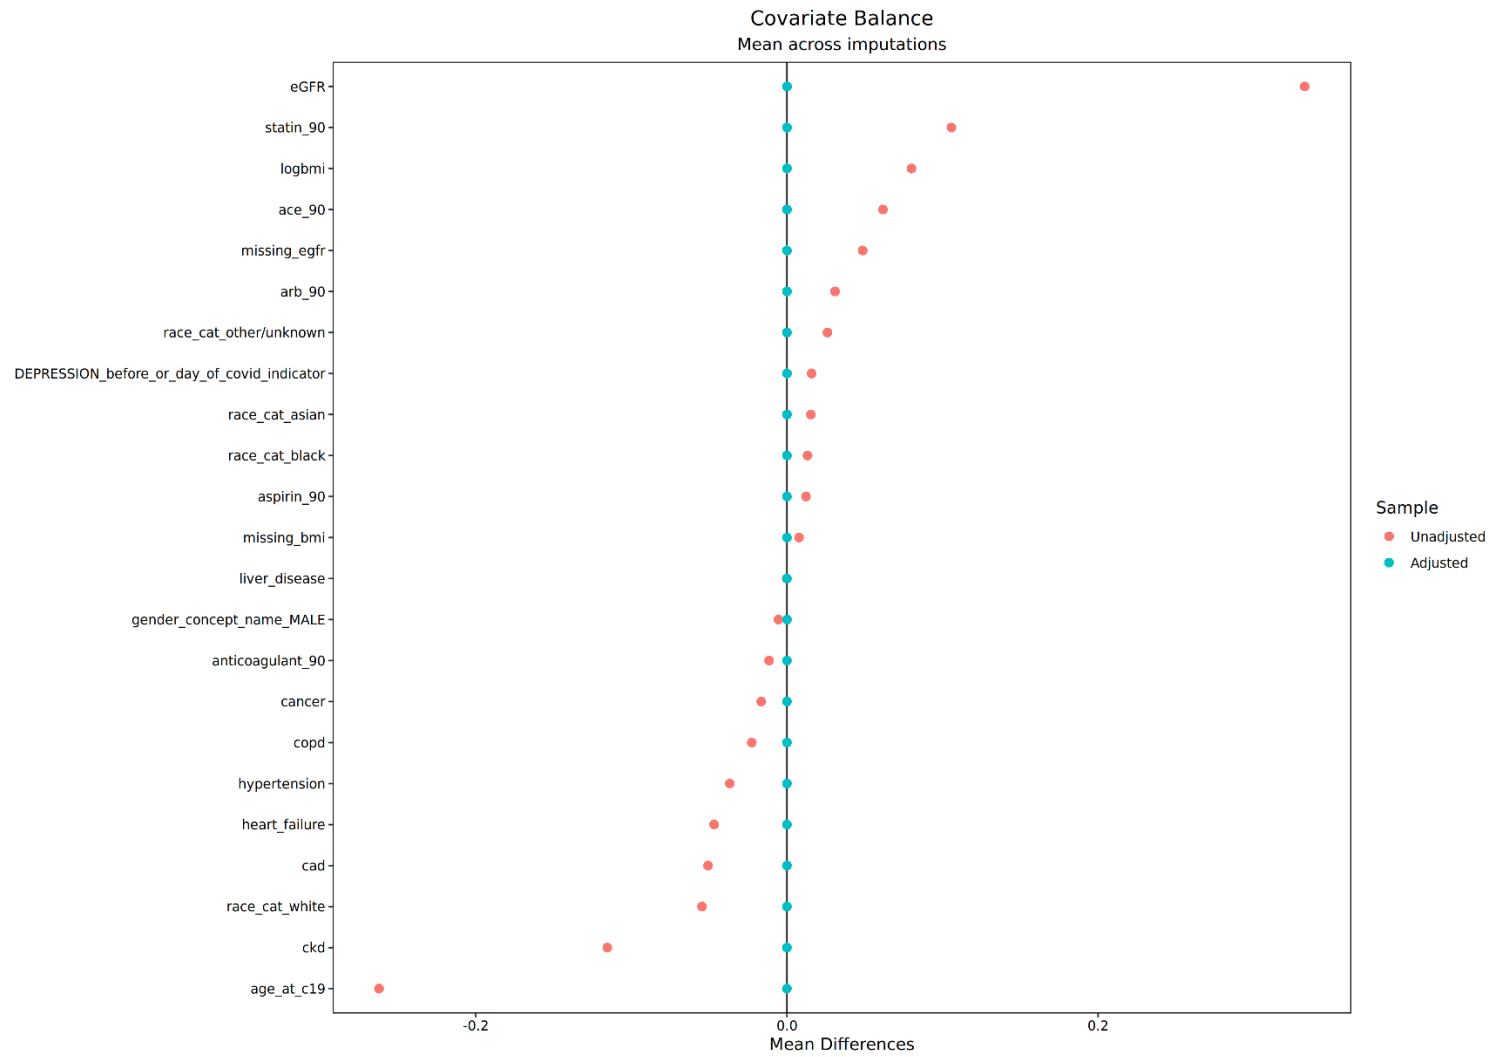

**Supplemental Figure 1.** Standardized mean differences of covariates comparing metformin vs SU/DPP4i for cohort 2 before and after weighting

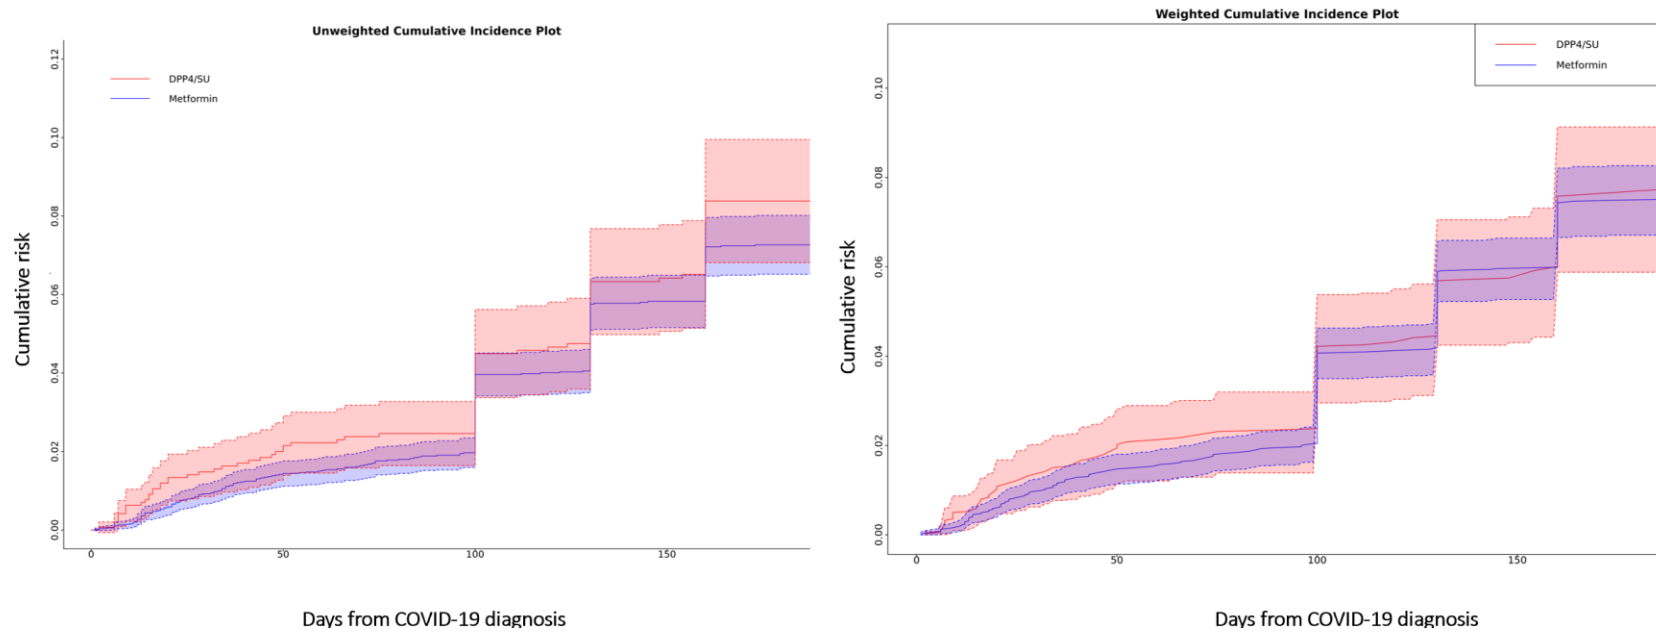

**Supplemental Figure 2.** Weighted and unweighted cumulative incidence curves for PASC defined using presence of predicted probability  $\geq 0.7$  or ICD-10 code.

**Supplemental Table 1.** Weighted and unweighted distribution of study covariates at COVID-19 diagnosis for cohort 2

| Covariate                         | Unweighted Cohort |       |                |       | Weighted Cohort |                |
|-----------------------------------|-------------------|-------|----------------|-------|-----------------|----------------|
|                                   | Metformin Users   |       | SU/DPP4i Users |       | Metformin Users | SU/DPP4i Users |
|                                   | N = 10,964        |       | N = 2,860      |       | %               | %              |
|                                   | N                 | %     | N              | %     |                 |                |
| Mean Years of Age (SD)            | 60.5              | 12.5  | 63.7           | 12.4  | 61.1 (12.4)     | 61.1 (12.6)    |
| Race                              |                   |       |                |       |                 |                |
| White                             | 5,494             | 61.5% | 1616           | 65.7% | 59.5%           | 59.5%          |
| Black or African American         | 2,192             | 24.5% | 574            | 23.3% | 23.9%           | 23.9%          |
| Asian                             | 331               | 3.7%  | 64             | 2.6%  | 5.1%            | 5.1%           |
| Other/Unknown                     | 913               | 10.2% | 207            | 8.4%  | 11.5%           | 11.5%          |
| Male Gender                       | 4,859             | 44.3% | 1,283          | 44.9% | 44.4%           | 44.4%          |
| Log BMI (SD)                      | 3.5               | 0.3   | 3.5            | 0.2   | 3.5 (0.3)       | 3.5 (0.3)      |
| Mean eGFR (SD)                    | 85.6              | 30.5  | 77.9           | 34.1  | 88.2 (33.9)     | 88.2 (39.3)    |
| Heart failure                     | 1,089             | 9.9%  | 418            | 14.6% | 10.9%           | 10.9%          |
| Hypertension                      | 8,717             | 79.5% | 2,379          | 83.2% | 80.3%           | 80.3%          |
| Coronary Artery Disease           | 1,844             | 16.8% | 626            | 21.9% | 17.9%           | 17.9%          |
| COPD                              | 1,071             | 9.8%  | 344            | 12.0% | 10.2%           | 10.2%          |
| Cancer                            | 1,226             | 11.2% | 367            | 12.8% | 11.5%           | 11.5%          |
| CKD stage 1, 2, or 3 <sup>a</sup> | 1,333             | 12.2% | 678            | 23.7% | 14.5%           | 14.5%          |
| Liver Disease                     | 439               | 4.0%  | 115            | 4.0%  | 4.0%            | 4.0%           |
| Depression                        | 3,083             | 28.1% | 759            | 26.5% | 27.8%           | 27.8%          |
| ACE Inhibitor Use                 | 2,532             | 23.1% | 484            | 16.9% | 21.8%           | 21.8%          |
| ARB Use                           | 1,723             | 15.7% | 361            | 12.6% | 15.1%           | 15.1%          |
| Statin Use                        | 4,494             | 41.0% | 870            | 30.4% | 38.8%           | 38.8%          |
| Anti-Coagulant Use                | 748               | 6.8%  | 228            | 8.0%  | 7.1%            | 7.1%           |
| Aspirin use                       | 897               | 8.2%  | 199            | 7.0%  | 7.9%            | 7.9%           |

<sup>a</sup>Patients with CKD stage 4 or 5 were excluded to minimize the effects of confounding by severity. Abbreviations: SU = Sulfonylurea; DPP4i= Dipeptidyl Peptidase IV inhibitor; SD = Standard Deviation; eGFR = Estimated Glomerular filtration rate; BMI = Body Mass Index; COPD = Chronic Obstructive Pulmonary Disease; CKD = Chronic Kidney Disease; ACE = Angiotensin-Converting Enzyme; ARB = Angiotensin Receptor Blocker; SMD = Standardized Mean Difference.

**Supplemental Table 2.** Weighted risk estimates using binary ML cut point (above and below  $\geq 0.7$ ) definition of PASC

|                 | <b>Risk per 100 among Metformin Users (95% CI)</b> | <b>Risk per 100 among SU/DPP4i Users (95% CI)</b> | <b>Risk Difference per 100 (95% CI)</b> | <b>Risk Ratio (95% CI)</b> |
|-----------------|----------------------------------------------------|---------------------------------------------------|-----------------------------------------|----------------------------|
| <b>3-months</b> | 2.74 (2.42; 3.07)                                  | 2.59 (1.89; 3.28)                                 | 0.25 (-0.59; 1.10)                      | 1.08<br>(0.82; 1.43)       |
| <b>6-months</b> | 8.17 (7.61; 8.73)                                  | 8.07 (6.80; 9.32)                                 | 0.26 (-1.03; 1.55)                      | 1.03<br>(0.88; 1.21)       |

Abbreviations: SU = Sulfonylurea; DPP4i= Dipeptidyl Peptidase IV inhibitor; CI = Confidence Interval.

**Supplemental Table 3.** Weighted and unweighted risk estimates defining PASC as presence of predicted probability  $\geq 0.7$  or U09.9

| Unweighted Estimates |                                             |                                            |                                  |                      | Weighted Estimates                          |                                            |                                  |                      |
|----------------------|---------------------------------------------|--------------------------------------------|----------------------------------|----------------------|---------------------------------------------|--------------------------------------------|----------------------------------|----------------------|
|                      | Risk per 100 among Metformin Users (95% CI) | Risk per 100 among SU/DPP4i Users (95% CI) | Risk Difference per 100 (95% CI) | Risk Ratio (95% CI)  | Risk per 100 among Metformin Users (95% CI) | Risk per 100 among SU/DPP4i Users (95% CI) | Risk Difference per 100 (95% CI) | Risk Ratio (95% CI)  |
| <b>3-months</b>      | 1.88<br>(1.52; 2.25)                        | 2.46<br>(1.64; 3.27)                       | -0.55<br>(-1.67; 0.58)           | 0.87<br>(0.65; 1.15) | 1.95<br>(1.57; 2.34)                        | 2.38<br>(1.38; 3.20)                       | -0.22<br>(-1.42; 0.97)           | 0.94<br>(0.69; 1.29) |
| <b>6-months</b>      | 7.27<br>(6.52; 8.02)                        | 8.38<br>(6.81; 9.95)                       | -0.91<br>(-2.5; 0.67)            | 0.89<br>(0.73; 1.08) | 7.51<br>(6.71; 8.27)                        | 7.76<br>(5.88; 9.13)                       | -0.23<br>(-1.90; 1.43)           | 0.97<br>(0.78; 1.20) |

Abbreviations: SU = Sulfonylurea; DPP4i= Dipeptidyl Peptidase I inhibitor; CI = Confidence Interval.
